# Supplementary material
Source: PubMed Central journal article supplement (PMC3710764)
Supplement: mmc1.pdf [file mmc1.pdf]

The American Journal of Human Genetics, Volume 93

## **Supplemental Data**

### **Mutations in *KARS*, Encoding Lysyl-tRNA**

### **Synthetase, Cause Autosomal-Recessive**

### **Nonsyndromic Hearing Impairment DFNB89**

Regie Lyn Santos-Cortez, Kwanghyuk Lee, Zahid Azeem, Patrick J. Antonellis, Lana M. Pollock, Saadullah Khan, Irfanullah, Paula B. Andrade-Elizondo, Ilene Chiu, Mark D. Adams, Sulman Basit, Joshua D. Smith, University of Washington Center for Mendelian Genomics, Deborah A. Nickerson, Brian M. McDermott Jr., Wasim Ahmad, and Suzanne M. Leal



### Figure S1. Multiple-Sequence Alignment for KARS and Similar Proteins

Aligned sequences are from 165 non-human species, including 8 primates, 14 placental mammals, 3 non-placental mammals, 3 avian, 2 reptiles, 2 amphibians, 7 bony fish, 27 insects, 2 arachnids, 9 roundworms, 2 flatworms, 8 water animals, 22 plants, 44 fungi and 12 other eukaryotes. Protein sequences were derived from the UniProtKB database using blastp and aligned using ClustalW2. For the human sequence, residues 166-180 and 370-384 from KARS (NP\_001123561) are shown. The tyrosine residue at position 173 is highly conserved, and is replaced by a phenylalanine in only 3 of 165 proteins from non-human species (highlighted in cyan), namely *Harpegnathos saltator* (Jerdon's jumping ant), *Apis mellifera* (honeybee) and *Anopheles gambiae* (mosquito). The aspartic acid residue at position 377 (blue letters highlighted in yellow) is identical in all aligned sequences.



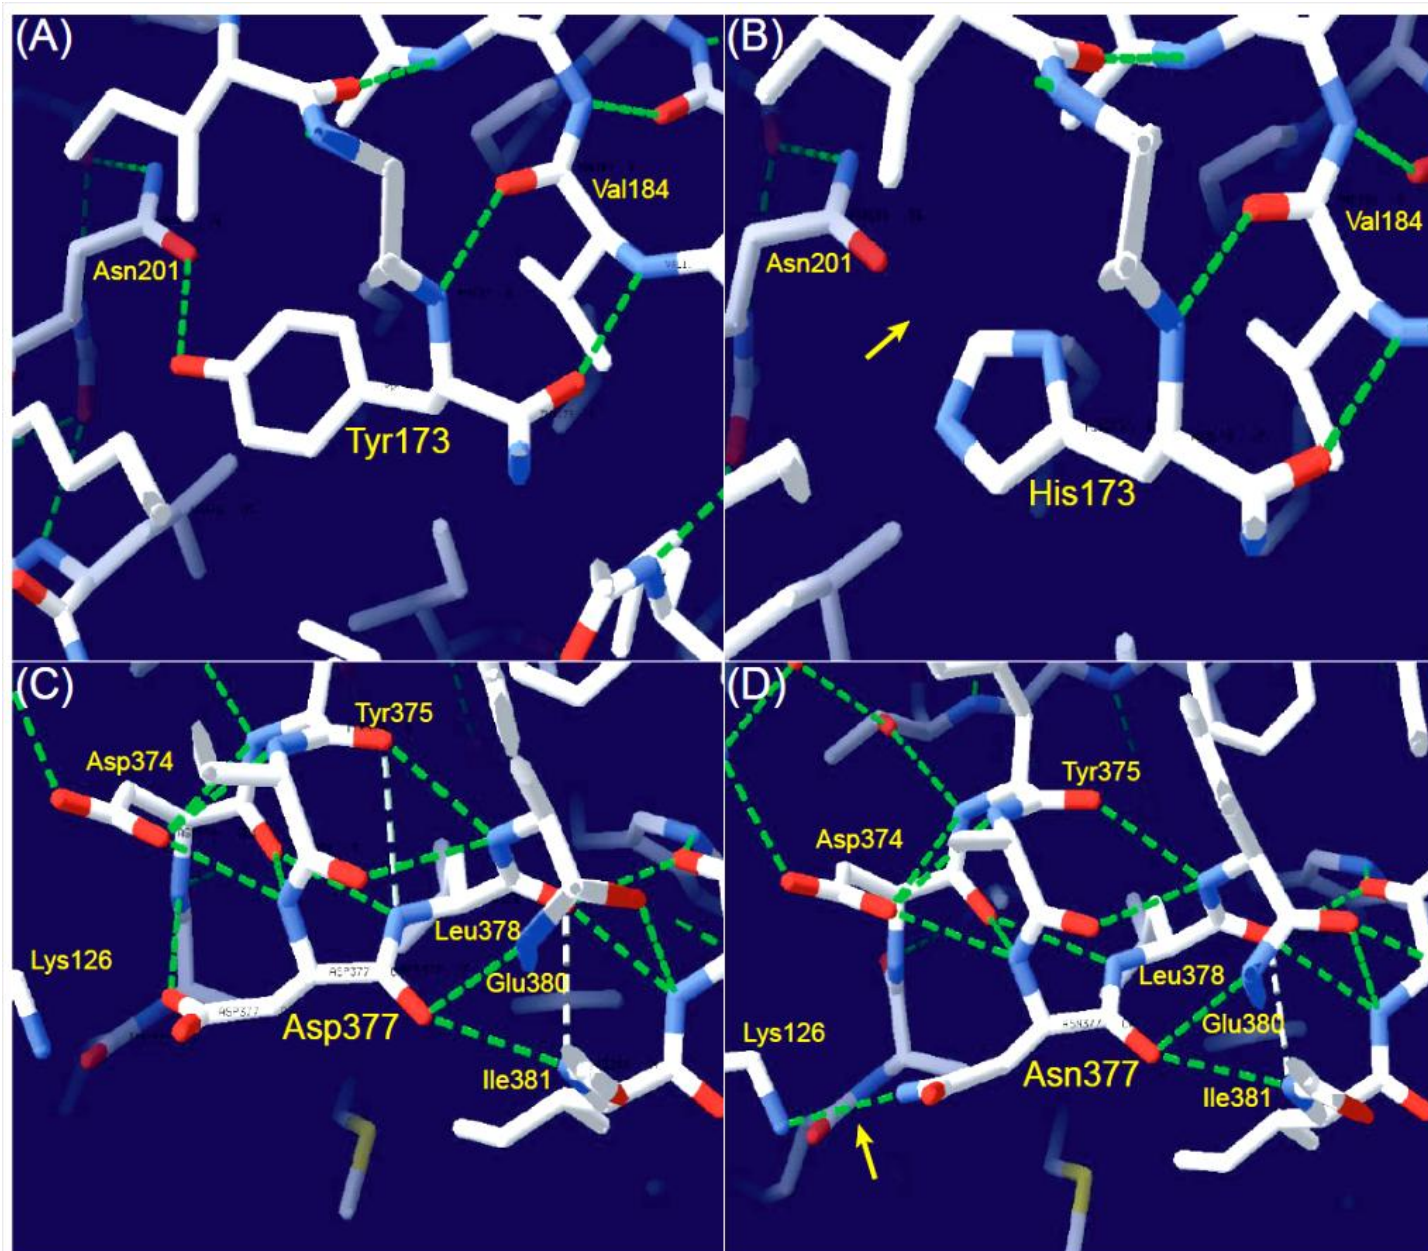

**Figure S2. Structural Modeling for Altered KARS**

H-bonds are shown as green dotted lines.

(A) Wild-type KARS with tyrosine at position 173.

(B) Altered KARS with histidine at position 173. Yellow arrow indicates loss of an H-bond between  $\beta$ -strand 2 and  $\alpha$ -helix 3.

(C) Wild-type KARS with aspartic acid at position 377.

(D) Altered KARS with asparagine at position 377. Yellow arrow points to a gained H-bond between interacting KARS monomers. Additionally an H-bond between asparagine residues at positions 374 and 377 is lost, possibly resulting in loss of  $\alpha$ -helix 9.

**Table S1. ABR Findings in Individuals with *KARS* Mutations**

| Individual ID             | dB  | Side  | Latency Wave I (ms) | Latency Wave III (ms) | Latency Wave V (ms) | Inter-peak I-III | Inter-peak III-V | Inter-peak I-V |
|---------------------------|-----|-------|---------------------|-----------------------|---------------------|------------------|------------------|----------------|
| 4406<br>IV-2              | 100 | Right | 1.30                | 3.65                  | 5.55                | 2.35             | 1.90             | 4.25           |
|                           |     | Left  | 1.10                | 3.55                  | 5.05                | 2.45             | 1.50             | 3.95           |
|                           | 90  | Right | 2.85                | 4.95                  | 7.00                | 2.10             | 2.05             | 4.15           |
|                           |     | Left  | 1.90                | 4.00                  | 6.05                | 2.10             | 2.05             | 4.15           |
|                           | 80  | Right | --                  | 3.35                  | --                  | --               | --               | --             |
|                           |     | Left  | --                  | --                    | 5.95                | --               | --               | --             |
| 4406<br>IV-7 <sup>a</sup> | 100 | Right | 1.00                | 3.60                  | 5.65                | 2.60             | 2.05             | 4.65           |
|                           |     | Left  | 1.31                | 4.65                  | 6.85                | 3.34             | 2.20             | 5.54           |
|                           | 90  | Right | --                  | 3.40                  | 5.05                | --               | 1.65             | --             |
|                           |     | Left  | --                  | 3.10                  | 5.90                | --               | 2.80             | --             |
|                           | 80  | Right | --                  | 5.23                  | --                  | --               | --               | --             |
|                           |     | Left  | --                  | --                    | --                  | --               | --               | --             |

<sup>a</sup> For individual IV-7 the compliance peak for the tympanogram on the left ear was absent (type B ear), indicating possible middle ear effusion or otitis media at the time of testing.

**Table S2. Interexonic Primer Pairs for Zebrafish and Mouse *Kars* Gene**

| Exon       | Forward                  | Reverse                   |
|------------|--------------------------|---------------------------|
| zf_Kars_1  | CAGAATATGCCAACTGCAAGCGC  | CCATGACCTGCAGCTTGACTCC    |
| zf_Kars_2  | CCTGATCCCTGGTGGCGCAGT    | AGCTCTTGGGTCATGCTGATTCCG  |
| zf_Kars_3  | GGAGGTGAAGTGCATCAACCCAA  | CCCTCTGCAGGTGCAGCTGGT     |
| Mus_Kars_1 | TCAGAGGGAACCTTCGACTGGGC  | GTTGGCCATGACTTGTAACCTTGAC |
| Mus_Kars_2 | GAGACATAATTGGAGTTGAGGGCA | TGCATAGGCCATGTAGAACTCACA  |
| Mus_Kars_3 | TCAGCATGGTAGAAGAGCTTGAGA | ATCGGTGAGAAACATGGTGAGCC   |
